# Supplementary material
Source: PubMed Central journal article supplement (PMC2234218)
Supplement: pnas_0711406105_2.pdf [file pnas_0711406105_2.pdf]

Barley HM1 MAEFGKGTGSNGGRGVRAACVTGGAGFIGSWLVRKLLLEAGYTVHATLRSIGDEGKAGLLRG  
Maize HM1 MAEK----SNG---VRVCVTGGAGFIGSWLVRKLLLEKGYTVHATLRNTGDEAKAGLLRR

Barley HM1 LVPGGAPPERLVLFEDIYDAASFAPAIAGCHFVFLVANPSAHEAAASKYKTSADAATDA  
Maize HM1 LVPG--AAERLRLRFQADLFDAATFAPAIAGCQFVFLVATPFGLDSAGSQYKSTAEAVVDA

Barley HM1 VRVILRLCAESRTVKRVIHTASVTAASPLTKSSSAAAAY-YGDFISESCWTLLDVNYPLR  
Maize HM1 VRAILRQCEESRTVKRVIHTASVAASPLLEEEVSASGVGYRDFIDESCWTSLNVDYPLR

Barley HM1 SVHFDKYIESKVLSEKELLSYNDGESPAFEVVTLPPLGLVGGNTVLGYLPETMESVVAPVT  
Maize HM1 SAHFDKYILSKLRSEQELLSYNGGESPAFEVVTLPPLGLVAGDTVLGRAPETVESAVAPVS

Barley HM1 KQEPFCFMLPRILQRLLGSVPLVHVDDVCAALIFCMEQ-PALSGRFLCAAAYPTIHDILDH  
Maize HM1 RSEPCFGLLRILQQLLGSPLVHVDDVCDALVFCMERRPSVAGRFLCAAAYPTIHDVVAH

Barley HM1 YGSKYPHLDLLRETDEVARVQPDKNKLGELGFYKYGLKEILDESIDCAVRLGSLDASKL  
Maize HM1 YASKFPHLDILKETEA VATVRPARDRLGELGFKYKYGMEEILDSVACARLGSLDASKL

Barley HM1 IVQQG  
Maize HM1 GLQKG
